# Supplementary material for: Probiotics’ Effects in the Treatment of Anxiety and Depression: A Comprehensive Review of 2014–2023 Clinical Trials
Source: MDPI journal article supplement (doi:10.3390/microorganisms12020411), 2024-02-19
Supplement: s1 [file s1]

**Supplementary Table S1.** Quality assessment of included clinical trials based on Jadad scale

| First author, year              | 1. Was the study described as randomized? | 2. Was the study described as double-blind? | 3. Was there a description of withdrawals and drop-outs? | 4. Was the randomization appropriate or inappropriate? | 5. Was the blinding appropriate or inappropriate? | Quality Score |
|---------------------------------|-------------------------------------------|---------------------------------------------|----------------------------------------------------------|--------------------------------------------------------|---------------------------------------------------|---------------|
| Schaub et al., 2022             | YES                                       | YES                                         | YES                                                      | N/A                                                    | N/A                                               | 3             |
| Kazemi et al., 2018             | YES                                       | YES                                         | YES                                                      | YES                                                    | YES                                               | 5             |
| Lee et al., 2021                | YES                                       | YES                                         | YES                                                      | YES                                                    | YES                                               | 5             |
| Chahwan et al., 2019            | YES                                       | YES                                         | YES                                                      | YES                                                    | YES                                               | 5             |
| Rode et al., 2022               | YES                                       | YES                                         | YES                                                      | YES                                                    | YES                                               | 5             |
| Pinto-Sanchez et al., 2017      | YES                                       | YES                                         | YES                                                      | YES                                                    | YES                                               | 5             |
| Yang et al., 2014               | YES                                       | NO                                          | NO                                                       | YES                                                    | N/A                                               | 2             |
| Reininghaus et al., 2020        | YES                                       | YES                                         | YES                                                      | YES                                                    | YES                                               | 5             |
| Zhu et al., 2023                | YES                                       | NO                                          | NO                                                       | YES                                                    | N/A                                               | 2             |
| Chen et al., 2021               | NO                                        | NO                                          | YES                                                      | N/A                                                    | N/A                                               | 1             |
| Tran et al., 2019               | YES                                       | YES                                         | NO                                                       | N/A                                                    | N/A                                               | 2             |
| Slykerman et al., 2017          | YES                                       | YES                                         | YES                                                      | YES                                                    | YES                                               | 5             |
| Rudzki et al., 2019             | YES                                       | YES                                         | YES                                                      | YES                                                    | YES                                               | 5             |
| Romijn et al., 2017             | YES                                       | YES                                         | YES                                                      | YES                                                    | YES                                               | 5             |
| Morales-Torres et al., 2023     | YES                                       | YES                                         | YES                                                      | YES                                                    | YES                                               | 5             |
| Miyaoka et al., 2018            | YES                                       | NO                                          | YES                                                      | N/A                                                    | N/A                                               | 2             |
| Ho et al., 2021                 | YES                                       | YES                                         | YES                                                      | N/A                                                    | N/A                                               | 3             |
| Haghighat et al., 2021          | YES                                       | YES                                         | YES                                                      | YES                                                    | YES                                               | 5             |
| Gawlik-Kotelnicka et al., 2023  | YES                                       | YES                                         | YES                                                      | YES                                                    | YES                                               | 5             |
| Dawe et al., 2020               | YES                                       | YES                                         | YES                                                      | YES                                                    | YES                                               | 5             |
| Browne et al., 2021             | YES                                       | YES                                         | YES                                                      | YES                                                    | YES                                               | 5             |
| Boehme et al., 2017             | YES                                       | YES                                         | YES                                                      | YES                                                    | N/A                                               | 4             |
| Ostlund-Lagerstrom et al., 2015 | YES                                       | YES                                         | YES                                                      | YES                                                    | YES                                               | 5             |
| Lew et al., 2018                | YES                                       | YES                                         | YES                                                      | YES                                                    | YES                                               | 5             |
| Mohammadi et al., 2015          | YES                                       | YES                                         | YES                                                      | YES                                                    | N/A                                               | 4             |

|                              |     |     |     |     |     |   |
|------------------------------|-----|-----|-----|-----|-----|---|
| Raygan et al.,<br>2018       | YES | YES | YES | YES | N/A | 4 |
| Nikolova et al.,<br>2023     | YES | YES | YES | YES | YES | 5 |
| Hadi et al.,<br>2019         | Yes | Yes | Yes | Yes | YES | 5 |
| Venkataraman<br>et al., 2020 | YES | YES | YES | YES | YES | 5 |
| Adikari et al.,<br>2020      | YES | YES | YES | YES | YES | 5 |
